# Supplementary material
Source: PubMed Central journal article supplement (PMC4326945)
Supplement: acel0013-0755-sd2.pdf [file acel0013-0755-sd2.pdf]

Table for data of  $w^{1118}$  male Fig. 1A

Supplementary table

| <b>age (d)</b> | <b>interval (d)</b> | <b>Nx</b> | <b>dx</b> |
|----------------|---------------------|-----------|-----------|
| 0              | n/a                 | 273       | 0         |
| 4              | 4                   | 273       | 5         |
| 7              | 3                   | 268       | 5         |
| 11             | 4                   | 263       | 4         |
| 14             | 3                   | 259       | 11        |
| 17             | 3                   | 248       | 17        |
| 20             | 3                   | 231       | 29        |
| 24             | 4                   | 202       | 29        |
| 27             | 3                   | 173       | 20        |
| 31             | 4                   | 153       | 25        |
| 34             | 3                   | 128       | 28        |
| 38             | 4                   | 100       | 25        |
| 41             | 3                   | 75        | 41        |
| 45             | 4                   | 34        | 17        |
| 48             | 3                   | 17        | 12        |
| 52             | 4                   | 5         | 3         |
| 55             | 3                   | 2         | 2         |
| 59             | 4                   | 0         | 0         |

Table for data of *inaE*<sup>EP1101</sup> male Fig. 1A

Supplementary table

| <b>age (d)</b> | <b>interval (d)</b> | <b>Nx</b> | <b>dx</b> |
|----------------|---------------------|-----------|-----------|
| 0              | n/a                 | 306       | 0         |
| 4              | 4                   | 306       | 2         |
| 7              | 3                   | 304       | 0         |
| 11             | 4                   | 304       | 1         |
| 14             | 3                   | 303       | 2         |
| 17             | 3                   | 301       | 0         |
| 20             | 3                   | 301       | 0         |
| 24             | 4                   | 301       | 1         |
| 27             | 3                   | 300       | 2         |
| 31             | 4                   | 298       | 5         |
| 34             | 3                   | 293       | 2         |
| 38             | 4                   | 291       | 2         |
| 41             | 3                   | 289       | 4         |
| 45             | 4                   | 285       | 6         |
| 48             | 3                   | 279       | 15        |
| 52             | 4                   | 264       | 18        |
| 55             | 3                   | 246       | 28        |
| 59             | 4                   | 218       | 27        |
| 62             | 3                   | 191       | 72        |
| 66             | 4                   | 119       | 28        |
| 69             | 3                   | 91        | 59        |
| 73             | 4                   | 32        | 5         |
| 76             | 3                   | 27        | 14        |
| 80             | 4                   | 13        | 11        |
| 87             | 7                   | 2         | 2         |
| 90             | 3                   | 0         | 0         |

Table for data of  $w^{1118}$  male Fig. 1B

Supplementary table

| <b>age (hr)</b> | <b>interval (hr)</b> | <b>Nx</b> | <b>dx</b> |
|-----------------|----------------------|-----------|-----------|
| 0               | n/a                  | 69        | 6         |
| 16              | 16                   | 63        | 6         |
| 20              | 4                    | 57        | 2         |
| 24              | 4                    | 55        | 4         |
| 28              | 4                    | 51        | 11        |
| 40              | 12                   | 40        | 7         |
| 44              | 4                    | 33        | 8         |
| 48              | 4                    | 25        | 6         |
| 52              | 4                    | 19        | 17        |
| 64              | 12                   | 2         | 1         |
| 69              | 5                    | 1         | 1         |
| 73              | 4                    | 0         | 0         |

Table for data of *inaE*<sup>EP1101</sup> male Fig. 1B

Supplementary table

| <b>age (hr)</b> | <b>interval (hr)</b> | <b>Nx</b> | <b>dx</b> |
|-----------------|----------------------|-----------|-----------|
| 0               | n/a                  | 87        | 1         |
| 16              | 16                   | 86        | 1         |
| 20              | 4                    | 85        | 3         |
| 24              | 4                    | 82        | 1         |
| 28              | 4                    | 81        | 5         |
| 40              | 12                   | 76        | 0         |
| 44              | 4                    | 76        | 3         |
| 48              | 4                    | 73        | 2         |
| 52              | 4                    | 71        | 10        |
| 64              | 12                   | 61        | 7         |
| 69              | 5                    | 54        | 8         |
| 73              | 4                    | 46        | 9         |
| 76              | 3                    | 37        | 14        |
| 87              | 11                   | 23        | 8         |
| 91              | 4                    | 15        | 6         |
| 96              | 5                    | 9         | 5         |
| 100             | 4                    | 4         | 4         |
| 112             | 12                   | 0         | 0         |

Table for data of  $w^{1118}$  male Fig. 1E

Supplementary table

| <b>age (d)</b> | <b>interval (d)</b> | <b>Nx</b> | <b>dx</b> |
|----------------|---------------------|-----------|-----------|
| 0              | n/a                 | 300       | 2         |
| 3              | 3                   | 298       | 2         |
| 7              | 4                   | 296       | 3         |
| 10             | 3                   | 293       | 0         |
| 14             | 4                   | 293       | 3         |
| 17             | 3                   | 290       | 12        |
| 21             | 4                   | 278       | 4         |
| 24             | 3                   | 274       | 34        |
| 28             | 4                   | 240       | 47        |
| 35             | 7                   | 193       | 13        |
| 38             | 3                   | 180       | 47        |
| 42             | 4                   | 133       | 31        |
| 45             | 3                   | 102       | 53        |
| 49             | 4                   | 49        | 17        |
| 52             | 3                   | 32        | 17        |
| 57             | 5                   | 15        | 7         |
| 60             | 3                   | 8         | 2         |
| 63             | 3                   | 6         | 4         |
| 66             | 3                   | 2         | 1         |
| 70             | 4                   | 1         | 1         |
| 77             | 7                   | 0         | 0         |

Table for data of *inaE*<sup>KG08585</sup> male Fig. 1E

Supplementary table

| <b>age (d)</b> | <b>interval (d)</b> | <b>Nx</b> | <b>dx</b> |
|----------------|---------------------|-----------|-----------|
| 0              | n/a                 | 254       | 24        |
| 4              | 4                   | 230       | 14        |
| 7              | 3                   | 216       | 12        |
| 11             | 4                   | 204       | 15        |
| 14             | 3                   | 189       | 13        |
| 17             | 3                   | 176       | 37        |
| 20             | 3                   | 139       | 61        |
| 24             | 4                   | 78        | 67        |
| 27             | 3                   | 11        | 3         |
| 31             | 4                   | 8         | 4         |
| 34             | 3                   | 4         | 2         |
| 38             | 4                   | 2         | 2         |
| 41             | 3                   | 0         | 0         |

Table for data of  $w^{1118}$  male Fig. 1F

Supplementary table

| <b>age (hr)</b> | <b>interval (hr)</b> | <b>Nx</b> | <b>dx</b> |
|-----------------|----------------------|-----------|-----------|
| 0               | n/a                  | 100       | 17        |
| 17              | 17                   | 83        | 5         |
| 21              | 4                    | 78        | 7         |
| 25              | 4                    | 71        | 6         |
| 28              | 3                    | 65        | 11        |
| 41              | 13                   | 54        | 2         |
| 45              | 4                    | 52        | 2         |
| 49              | 4                    | 50        | 1         |
| 52              | 3                    | 49        | 8         |
| 64              | 12                   | 41        | 3         |
| 68              | 4                    | 38        | 6         |
| 72              | 4                    | 32        | 5         |
| 75              | 3                    | 27        | 10        |
| 89              | 14                   | 17        | 5         |
| 93              | 4                    | 12        | 6         |
| 97              | 4                    | 6         | 1         |
| 100             | 3                    | 5         | 4         |
| 113             | 13                   | 1         | 1         |
| 117             | 4                    | 0         | 0         |

Table for data of *inaE*<sup>KG08585</sup> male Fig. 1F

Supplementary table

| <b>age (hr)</b> | <b>interval (hr)</b> | <b>Nx</b> | <b>dx</b> |
|-----------------|----------------------|-----------|-----------|
| 0               | n/a                  | 100       | 43        |
| 17              | 17                   | 57        | 4         |
| 21              | 4                    | 53        | 7         |
| 25              | 4                    | 46        | 7         |
| 28              | 3                    | 39        | 12        |
| 41              | 13                   | 27        | 1         |
| 45              | 4                    | 26        | 0         |
| 49              | 4                    | 26        | 0         |
| 52              | 3                    | 26        | 7         |
| 64              | 12                   | 19        | 4         |
| 68              | 4                    | 15        | 3         |
| 72              | 4                    | 12        | 5         |
| 75              | 3                    | 7         | 4         |
| 89              | 14                   | 3         | 1         |
| 93              | 4                    | 2         | 0         |
| 97              | 4                    | 2         | 1         |
| 100             | 3                    | 1         | 1         |
| 113             | 13                   | 0         | 0         |



Table for data of *GMR-Gal4>UAS-DAGL* Fig. 2A,C

Supplementary table

| <b>age (d)</b> | <b>interval (d)</b> | <b>Nx</b> | <b>dx</b> |
|----------------|---------------------|-----------|-----------|
| 0              | n/a                 | 206       | 0         |
| 5              | 5                   | 206       | 0         |
| 8              | 3                   | 206       | 0         |
| 9              | 1                   | 206       | 0         |
| 11             | 2                   | 206       | 1         |
| 14             | 3                   | 205       | 2         |
| 18             | 4                   | 203       | 0         |
| 21             | 3                   | 203       | 1         |
| 24             | 3                   | 202       | 3         |
| 28             | 4                   | 199       | 5         |
| 31             | 3                   | 194       | 17        |
| 35             | 4                   | 177       | 18        |
| 38             | 3                   | 159       | 25        |
| 42             | 4                   | 134       | 23        |
| 46             | 4                   | 111       | 25        |
| 49             | 3                   | 86        | 21        |
| 52             | 3                   | 65        | 16        |
| 56             | 4                   | 49        | 26        |
| 59             | 3                   | 23        | 9         |
| 63             | 4                   | 14        | 5         |
| 66             | 3                   | 9         | 3         |
| 70             | 4                   | 6         | 5         |
| 73             | 3                   | 1         | 0         |
| 77             | 4                   | 1         | 0         |
| 80             | 3                   | 1         | 1         |
| 84             | 4                   | 0         | 0         |

Table for data of *UAS-DAGL/+* Fig. 2A

Supplementary table

| <b>age (d)</b> | <b>interval (d)</b> | <b>Nx</b> | <b>dx</b> |
|----------------|---------------------|-----------|-----------|
| 0              | n/a                 | 292       | 0         |
| 5              | 5                   | 292       | 0         |
| 8              | 3                   | 292       | 0         |
| 9              | 1                   | 292       | 2         |
| 11             | 2                   | 290       | 1         |
| 14             | 3                   | 289       | 4         |
| 18             | 4                   | 285       | 3         |
| 21             | 3                   | 282       | 7         |
| 24             | 3                   | 275       | 15        |
| 28             | 4                   | 260       | 18        |
| 31             | 3                   | 242       | 34        |
| 35             | 4                   | 208       | 71        |
| 38             | 3                   | 137       | 34        |
| 42             | 4                   | 103       | 18        |
| 46             | 4                   | 85        | 23        |
| 49             | 3                   | 62        | 18        |
| 52             | 3                   | 44        | 13        |
| 56             | 4                   | 31        | 9         |
| 59             | 3                   | 22        | 10        |
| 63             | 4                   | 12        | 3         |
| 66             | 3                   | 9         | 5         |
| 70             | 4                   | 4         | 2         |
| 73             | 3                   | 2         | 0         |
| 77             | 4                   | 2         | 2         |
| 80             | 3                   | 0         | 0         |

Table for data of *GMR-Gal4/+* Fig. 2A,B,C

Supplementary table

| <b>age (d)</b> | <b>interval (d)</b> | <b>Nx</b> | <b>dx</b> |
|----------------|---------------------|-----------|-----------|
| 0              | n/a                 | 258       | 0         |
| 5              | 5                   | 258       | 0         |
| 8              | 3                   | 258       | 0         |
| 9              | 1                   | 258       | 2         |
| 11             | 2                   | 256       | 6         |
| 14             | 3                   | 250       | 6         |
| 18             | 4                   | 244       | 16        |
| 21             | 3                   | 228       | 25        |
| 24             | 3                   | 203       | 26        |
| 28             | 4                   | 177       | 32        |
| 31             | 3                   | 145       | 27        |
| 35             | 4                   | 118       | 39        |
| 38             | 3                   | 79        | 46        |
| 42             | 4                   | 33        | 14        |
| 46             | 4                   | 19        | 7         |
| 49             | 3                   | 12        | 5         |
| 52             | 3                   | 7         | 4         |
| 56             | 4                   | 3         | 0         |
| 59             | 3                   | 3         | 2         |
| 63             | 4                   | 1         | 0         |
| 66             | 3                   | 1         | 1         |
| 70             | 4                   | 0         | 0         |

Table for data of *GMR-Gal4>UAS-rdgA<sup>RNAi</sup>* Fig. 2B,C

Supplementary table

| <b>age (d)</b> | <b>interval (d)</b> | <b>Nx</b> | <b>dx</b> |
|----------------|---------------------|-----------|-----------|
| 0              | n/a                 | 62        | 0         |
| 5              | 5                   | 62        | 0         |
| 8              | 3                   | 62        | 0         |
| 9              | 1                   | 62        | 1         |
| 11             | 2                   | 61        | 0         |
| 14             | 3                   | 61        | 2         |
| 18             | 4                   | 59        | 1         |
| 21             | 3                   | 58        | 1         |
| 24             | 3                   | 57        | 0         |
| 28             | 4                   | 57        | 1         |
| 31             | 3                   | 56        | 3         |
| 35             | 4                   | 53        | 4         |
| 38             | 3                   | 49        | 7         |
| 42             | 4                   | 42        | 9         |
| 46             | 4                   | 33        | 7         |
| 49             | 3                   | 26        | 4         |
| 52             | 3                   | 22        | 5         |
| 56             | 4                   | 17        | 1         |
| 59             | 3                   | 16        | 7         |
| 63             | 4                   | 9         | 2         |
| 66             | 3                   | 7         | 2         |
| 70             | 4                   | 5         | 2         |
| 73             | 3                   | 3         | 2         |
| 77             | 4                   | 1         | 1         |
| 80             | 3                   | 0         | 0         |

Table for data of *GMR-Gal4>UAS-rdgA<sup>RNAi</sup>* Fig. 2B

Supplementary table

| <b>age (d)</b> | <b>interval (d)</b> | <b>Nx</b> | <b>dx</b> |
|----------------|---------------------|-----------|-----------|
| 0              | n/a                 | 173       | 0         |
| 5              | 5                   | 173       | 0         |
| 8              | 3                   | 173       | 2         |
| 9              | 1                   | 171       | 0         |
| 11             | 2                   | 171       | 1         |
| 14             | 3                   | 170       | 0         |
| 18             | 4                   | 170       | 1         |
| 21             | 3                   | 169       | 8         |
| 24             | 3                   | 161       | 6         |
| 28             | 4                   | 155       | 12        |
| 31             | 3                   | 143       | 16        |
| 35             | 4                   | 127       | 27        |
| 38             | 3                   | 100       | 18        |
| 42             | 4                   | 82        | 11        |
| 46             | 4                   | 71        | 12        |
| 49             | 3                   | 59        | 20        |
| 52             | 3                   | 39        | 11        |
| 56             | 4                   | 28        | 17        |
| 59             | 3                   | 11        | 2         |
| 63             | 4                   | 9         | 3         |
| 66             | 3                   | 6         | 2         |
| 70             | 4                   | 4         | 4         |
| 73             | 3                   | 0         | 0         |

Table for data of *GMR-Gal4>UAS-DAGL/UAS-rdgA<sup>RNAi</sup>* Fig. 2C

Supplementary table

| <b>age (d)</b> | <b>interval (d)</b> | <b>Nx</b> | <b>dx</b> |
|----------------|---------------------|-----------|-----------|
| 0              | n/a                 | 203       | 0         |
| 5              | 5                   | 203       | 0         |
| 8              | 3                   | 203       | 1         |
| 9              | 1                   | 202       | 1         |
| 11             | 2                   | 201       | 2         |
| 14             | 3                   | 199       | 0         |
| 18             | 4                   | 199       | 4         |
| 21             | 3                   | 195       | 5         |
| 24             | 3                   | 190       | 3         |
| 28             | 4                   | 187       | 6         |
| 31             | 3                   | 181       | 11        |
| 35             | 4                   | 170       | 19        |
| 38             | 3                   | 151       | 25        |
| 42             | 4                   | 126       | 14        |
| 46             | 4                   | 112       | 16        |
| 49             | 3                   | 96        | 28        |
| 52             | 3                   | 68        | 14        |
| 56             | 4                   | 54        | 20        |
| 59             | 3                   | 34        | 17        |
| 63             | 4                   | 17        | 10        |
| 66             | 3                   | 7         | 5         |
| 70             | 4                   | 2         | 1         |
| 73             | 3                   | 1         | 1         |
| 77             | 4                   | 0         | 0         |

Table for data of *da-Gal4>UAS-DAGL* Fig. 2D,F

Supplementary table

| <b>age (d)</b> | <b>interval (d)</b> | <b>Nx</b> | <b>dx</b> |
|----------------|---------------------|-----------|-----------|
| 0              | n/a                 | 210       | 0         |
| 5              | 5                   | 210       | 0         |
| 7              | 2                   | 210       | 1         |
| 11             | 4                   | 209       | 3         |
| 15             | 4                   | 206       | 6         |
| 19             | 4                   | 200       | 5         |
| 22             | 3                   | 195       | 13        |
| 26             | 4                   | 182       | 21        |
| 29             | 3                   | 161       | 40        |
| 33             | 4                   | 121       | 33        |
| 36             | 3                   | 88        | 54        |
| 40             | 4                   | 34        | 12        |
| 43             | 3                   | 22        | 15        |
| 47             | 4                   | 7         | 3         |
| 50             | 3                   | 4         | 4         |
| 53             | 3                   | 0         | 0         |

Table for data of *UAS-DAGL/+* Fig. 2D

Supplementary table

| <b>age (d)</b> | <b>interval (d)</b> | <b>Nx</b> | <b>dx</b> |
|----------------|---------------------|-----------|-----------|
| 0              | n/a                 | 232       | 0         |
| 5              | 5                   | 232       | 0         |
| 7              | 2                   | 232       | 5         |
| 11             | 4                   | 227       | 2         |
| 15             | 4                   | 225       | 15        |
| 19             | 4                   | 210       | 23        |
| 22             | 3                   | 187       | 43        |
| 26             | 4                   | 144       | 26        |
| 29             | 3                   | 118       | 53        |
| 33             | 4                   | 65        | 37        |
| 36             | 3                   | 28        | 10        |
| 40             | 4                   | 18        | 9         |
| 43             | 3                   | 9         | 7         |
| 47             | 4                   | 2         | 2         |
| 50             | 3                   | 0         | 0         |



Table for data of *da-Gal4/+* Fig. 2D,E,F

Supplementary table

| <b>age (d)</b> | <b>interval (d)</b> | <b>Nx</b> | <b>dx</b> |
|----------------|---------------------|-----------|-----------|
| 0              | n/a                 | 209       | 0         |
| 5              | 5                   | 209       | 2         |
| 7              | 2                   | 207       | 0         |
| 11             | 4                   | 207       | 3         |
| 15             | 4                   | 204       | 10        |
| 19             | 4                   | 194       | 24        |
| 22             | 3                   | 170       | 47        |
| 26             | 4                   | 123       | 40        |
| 29             | 3                   | 83        | 49        |
| 33             | 4                   | 34        | 17        |
| 36             | 3                   | 17        | 10        |
| 40             | 4                   | 7         | 4         |
| 43             | 3                   | 3         | 2         |
| 47             | 4                   | 1         | 1         |
| 50             | 3                   | 0         | 0         |

Table for data of *da-Gal4>UAS-S6K<sup>KQ</sup>* Fig. 2E,F

Supplementary table

| <b>age (d)</b> | <b>interval (d)</b> | <b>Nx</b> | <b>dx</b> |
|----------------|---------------------|-----------|-----------|
| 0              | n/a                 | 50        | 0         |
| 5              | 5                   | 50        | 0         |
| 7              | 2                   | 50        | 1         |
| 11             | 4                   | 49        | 1         |
| 15             | 4                   | 48        | 0         |
| 19             | 4                   | 48        | 0         |
| 22             | 3                   | 48        | 7         |
| 26             | 4                   | 41        | 5         |
| 29             | 3                   | 36        | 10        |
| 33             | 4                   | 26        | 9         |
| 36             | 3                   | 17        | 12        |
| 40             | 4                   | 5         | 1         |
| 43             | 3                   | 4         | 2         |
| 47             | 4                   | 2         | 1         |
| 50             | 3                   | 1         | 1         |
| 53             | 3                   | 0         | 0         |

Table for data of *da-Gal4>UAS-S6K<sup>KQ</sup>* Fig. 2E

Supplementary table

| <b>age (d)</b> | <b>interval (d)</b> | <b>Nx</b> | <b>dx</b> |
|----------------|---------------------|-----------|-----------|
| 0              | n/a                 | 128       | 0         |
| 5              | 5                   | 128       | 0         |
| 7              | 2                   | 128       | 2         |
| 11             | 4                   | 126       | 8         |
| 15             | 4                   | 118       | 16        |
| 19             | 4                   | 102       | 29        |
| 22             | 3                   | 73        | 26        |
| 26             | 4                   | 47        | 15        |
| 29             | 3                   | 32        | 14        |
| 33             | 4                   | 18        | 11        |
| 36             | 3                   | 7         | 6         |
| 40             | 4                   | 1         | 0         |
| 43             | 3                   | 1         | 1         |
| 47             | 4                   | 0         | 0         |

Table for data of *da-Gal4>UAS-DAGL/UAS-S6K<sup>KQ</sup>* Fig. 2F

Supplementary table

| <b>age (d)</b> | <b>interval (d)</b> | <b>Nx</b> | <b>dx</b> |
|----------------|---------------------|-----------|-----------|
| 0              | n/a                 | 76        | 0         |
| 5              | 5                   | 76        | 0         |
| 7              | 2                   | 76        | 0         |
| 11             | 4                   | 76        | 1         |
| 15             | 4                   | 75        | 1         |
| 19             | 4                   | 74        | 3         |
| 22             | 3                   | 71        | 6         |
| 26             | 4                   | 65        | 17        |
| 29             | 3                   | 48        | 20        |
| 33             | 4                   | 28        | 13        |
| 36             | 3                   | 15        | 12        |
| 40             | 4                   | 3         | 1         |
| 43             | 3                   | 2         | 2         |
| 47             | 4                   | 0         | 0         |

Table for data of N2; *Ex[Pdpy-30::GFP]* Fig. 3A

Supplementary table

| <b>age (d)</b> | <b>interval (d)</b> | <b>Nx</b> | <b>dx</b> |
|----------------|---------------------|-----------|-----------|
| 0              | n/a                 | 121       | 0         |
| 1              | 1                   | 121       | 0         |
| 2              | 1                   | 121       | 1         |
| 3              | 1                   | 120       | 0         |
| 4              | 1                   | 120       | 5         |
| 5              | 1                   | 115       | 0         |
| 6              | 1                   | 115       | 5         |
| 7              | 1                   | 110       | 11        |
| 8              | 1                   | 99        | 6         |
| 9              | 1                   | 93        | 5         |
| 10             | 1                   | 88        | 10        |
| 11             | 1                   | 78        | 0         |
| 12             | 1                   | 78        | 22        |
| 13             | 1                   | 56        | 0         |
| 14             | 1                   | 56        | 12        |
| 15             | 1                   | 44        | 0         |
| 16             | 1                   | 44        | 20        |
| 17             | 1                   | 24        | 7         |
| 18             | 1                   | 17        | 9         |
| 19             | 1                   | 8         | 1         |
| 20             | 1                   | 7         | 0         |
| 21             | 1                   | 7         | 3         |
| 22             | 1                   | 4         | 1         |
| 23             | 1                   | 3         | 2         |
| 24             | 1                   | 1         | 0         |
| 25             | 1                   | 1         | 1         |
| 26             | 1                   | 0         | 0         |

Table for data of N2; *Ex[Pdpy-30::*dagl-1*::GFP](3)* Fig. 3A

Supplementary table

| <b>age (d)</b> | <b>interval (d)</b> | <b>Nx</b> | <b>dx</b> |
|----------------|---------------------|-----------|-----------|
| 0              | n/a                 | 104       | 0         |
| 1              | 1                   | 104       | 0         |
| 2              | 1                   | 104       | 0         |
| 3              | 1                   | 104       | 0         |
| 4              | 1                   | 104       | 2         |
| 5              | 1                   | 102       | 0         |
| 6              | 1                   | 102       | 3         |
| 7              | 1                   | 99        | 11        |
| 8              | 1                   | 88        | 1         |
| 9              | 1                   | 87        | 3         |
| 10             | 1                   | 84        | 6         |
| 11             | 1                   | 78        | 0         |
| 12             | 1                   | 78        | 11        |
| 13             | 1                   | 67        | 0         |
| 14             | 1                   | 67        | 16        |
| 15             | 1                   | 51        | 0         |
| 16             | 1                   | 51        | 14        |
| 17             | 1                   | 37        | 17        |
| 18             | 1                   | 20        | 9         |
| 19             | 1                   | 11        | 1         |
| 20             | 1                   | 10        | 0         |
| 21             | 1                   | 10        | 6         |
| 22             | 1                   | 4         | 4         |
| 23             | 1                   | 0         | 0         |

Table for data of N2; *Ex[Pdpy-30::dagl-1::GFP](4)* Fig. 3A

Supplementary table

| <b>age (d)</b> | <b>interval (d)</b> | <b>Nx</b> | <b>dx</b> |
|----------------|---------------------|-----------|-----------|
| 0              | n/a                 | 84        | 0         |
| 1              | 1                   | 84        | 0         |
| 2              | 1                   | 84        | 1         |
| 3              | 1                   | 83        | 0         |
| 4              | 1                   | 83        | 3         |
| 5              | 1                   | 80        | 0         |
| 6              | 1                   | 80        | 3         |
| 7              | 1                   | 77        | 8         |
| 8              | 1                   | 69        | 1         |
| 9              | 1                   | 68        | 2         |
| 10             | 1                   | 66        | 5         |
| 11             | 1                   | 61        | 0         |
| 12             | 1                   | 61        | 9         |
| 13             | 1                   | 52        | 0         |
| 14             | 1                   | 52        | 14        |
| 15             | 1                   | 38        | 0         |
| 16             | 1                   | 38        | 7         |
| 17             | 1                   | 31        | 8         |
| 18             | 1                   | 23        | 7         |
| 19             | 1                   | 16        | 3         |
| 20             | 1                   | 13        | 0         |
| 21             | 1                   | 13        | 6         |
| 22             | 1                   | 7         | 2         |
| 23             | 1                   | 5         | 3         |
| 24             | 1                   | 2         | 1         |
| 25             | 1                   | 1         | 1         |
| 26             | 1                   | 0         | 0         |

Table for data of N2 EV Fig. 3B

Supplementary table

| <b>age (d)</b> | <b>interval (d)</b> | <b>Nx</b> | <b>dx</b> |
|----------------|---------------------|-----------|-----------|
| 0              | n/a                 | 119       | 0         |
| 1              | 1                   | 119       | 0         |
| 2              | 1                   | 119       | 0         |
| 3              | 1                   | 119       | 0         |
| 4              | 1                   | 119       | 0         |
| 5              | 1                   | 119       | 1         |
| 6              | 1                   | 118       | 2         |
| 7              | 1                   | 116       | 3         |
| 8              | 1                   | 113       | 12        |
| 9              | 1                   | 101       | 15        |
| 10             | 1                   | 86        | 14        |
| 11             | 1                   | 72        | 14        |
| 12             | 1                   | 58        | 11        |
| 13             | 1                   | 47        | 13        |
| 14             | 1                   | 34        | 11        |
| 15             | 1                   | 23        | 6         |
| 16             | 1                   | 17        | 3         |
| 17             | 1                   | 14        | 6         |
| 18             | 1                   | 8         | 4         |
| 19             | 1                   | 4         | 3         |
| 20             | 1                   | 1         | 1         |
| 21             | 1                   | 0         | 0         |



Table for data of N2 *dagl-1* (*RNAi-1*) Fig. 3B

Supplementary table

| <b>age (d)</b> | <b>interval (d)</b> | <b>Nx</b> | <b>dx</b> |
|----------------|---------------------|-----------|-----------|
| 0              | n/a                 | 115       | 0         |
| 1              | 1                   | 115       | 0         |
| 2              | 1                   | 115       | 0         |
| 3              | 1                   | 115       | 0         |
| 4              | 1                   | 115       | 3         |
| 5              | 1                   | 112       | 4         |
| 6              | 1                   | 108       | 3         |
| 7              | 1                   | 105       | 12        |
| 8              | 1                   | 93        | 14        |
| 9              | 1                   | 79        | 14        |
| 10             | 1                   | 65        | 17        |
| 11             | 1                   | 48        | 14        |
| 12             | 1                   | 34        | 10        |
| 13             | 1                   | 24        | 12        |
| 14             | 1                   | 12        | 3         |
| 15             | 1                   | 9         | 4         |
| 16             | 1                   | 5         | 2         |
| 17             | 1                   | 3         | 2         |
| 18             | 1                   | 1         | 1         |
| 19             | 1                   | 0         | 0         |

Table for data of N2 *dagl-1* (RNAi-2) Fig. 3B

Supplementary table

| <b>age (d)</b> | <b>interval (d)</b> | <b>Nx</b> | <b>dx</b> |
|----------------|---------------------|-----------|-----------|
| 0              | n/a                 | 116       | 0         |
| 1              | 1                   | 116       | 0         |
| 2              | 1                   | 116       | 0         |
| 3              | 1                   | 116       | 0         |
| 4              | 1                   | 116       | 3         |
| 5              | 1                   | 113       | 3         |
| 6              | 1                   | 110       | 3         |
| 7              | 1                   | 107       | 7         |
| 8              | 1                   | 100       | 12        |
| 9              | 1                   | 88        | 21        |
| 10             | 1                   | 67        | 16        |
| 11             | 1                   | 51        | 15        |
| 12             | 1                   | 36        | 13        |
| 13             | 1                   | 23        | 6         |
| 14             | 1                   | 17        | 7         |
| 15             | 1                   | 10        | 5         |
| 16             | 1                   | 5         | 1         |
| 17             | 1                   | 4         | 2         |
| 18             | 1                   | 2         | 2         |
| 19             | 1                   | 0         | 0         |

Table for data of N2 Fig. 3C

Supplementary table

| <b>age (d)</b> | <b>interval (d)</b> | <b>Nx</b> | <b>dx</b> |
|----------------|---------------------|-----------|-----------|
| 0              | n/a                 | 235       | 0         |
| 2              | 2                   | 235       | 5         |
| 3              | 1                   | 230       | 2         |
| 4              | 1                   | 228       | 1         |
| 5              | 1                   | 227       | 13        |
| 6              | 1                   | 214       | 17        |
| 7              | 1                   | 197       | 36        |
| 8              | 1                   | 161       | 32        |
| 10             | 2                   | 129       | 7         |
| 12             | 2                   | 122       | 26        |
| 14             | 2                   | 96        | 25        |
| 16             | 2                   | 71        | 31        |
| 17             | 1                   | 40        | 22        |
| 18             | 1                   | 18        | 0         |
| 19             | 1                   | 18        | 9         |
| 20             | 1                   | 9         | 6         |
| 22             | 2                   | 3         | 0         |
| 24             | 2                   | 3         | 1         |
| 26             | 2                   | 2         | 2         |
| 27             | 1                   | 0         | 0         |

Table for data of *dagl-1(tm2908)* Fig. 3C

Supplementary table

| <b>age (d)</b> | <b>interval (d)</b> | <b>Nx</b> | <b>dx</b> |
|----------------|---------------------|-----------|-----------|
| 0              | n/a                 | 217       | 1         |
| 2              | 2                   | 216       | 2         |
| 3              | 1                   | 214       | 13        |
| 4              | 1                   | 201       | 4         |
| 5              | 1                   | 197       | 30        |
| 6              | 1                   | 167       | 26        |
| 7              | 1                   | 141       | 29        |
| 8              | 1                   | 112       | 26        |
| 10             | 2                   | 86        | 14        |
| 12             | 2                   | 72        | 36        |
| 14             | 2                   | 36        | 19        |
| 16             | 2                   | 17        | 10        |
| 17             | 1                   | 7         | 0         |
| 18             | 1                   | 7         | 1         |
| 19             | 1                   | 6         | 4         |
| 20             | 1                   | 2         | 2         |
| 22             | 2                   | 0         | 0         |

Table for data of N2 Fig. 3D

Supplementary table

| <b>age (d)</b> | <b>interval (d)</b> | <b>Nx</b> | <b>dx</b> |
|----------------|---------------------|-----------|-----------|
| 0              | n/a                 | 120       | 0         |
| 3              | 3                   | 120       | 0         |
| 5              | 2                   | 120       | 3         |
| 7              | 2                   | 117       | 10        |
| 9              | 2                   | 107       | 5         |
| 11             | 2                   | 102       | 29        |
| 12             | 1                   | 73        | 16        |
| 13             | 1                   | 57        | 13        |
| 14             | 1                   | 44        | 21        |
| 15             | 1                   | 23        | 3         |
| 17             | 2                   | 20        | 6         |
| 19             | 2                   | 14        | 10        |
| 20             | 1                   | 4         | 4         |
| 22             | 2                   | 0         | 0         |

Table for data of N2; *Ex[Pdpy-30::GFP]* Fig. 3E,F

Supplementary table

| <b>age (d)</b> | <b>interval (d)</b> | <b>Nx</b> | <b>dx</b> |
|----------------|---------------------|-----------|-----------|
| 0              | n/a                 | 108       | 0         |
| 1              | 1                   | 108       | 0         |
| 2              | 1                   | 108       | 0         |
| 3              | 1                   | 108       | 0         |
| 4              | 1                   | 108       | 0         |
| 5              | 1                   | 108       | 0         |
| 6              | 1                   | 108       | 2         |
| 7              | 1                   | 106       | 3         |
| 8              | 1                   | 103       | 9         |
| 9              | 1                   | 94        | 8         |
| 10             | 1                   | 86        | 14        |
| 11             | 1                   | 72        | 18        |
| 12             | 1                   | 54        | 11        |
| 13             | 1                   | 43        | 12        |
| 14             | 1                   | 31        | 9         |
| 15             | 1                   | 22        | 6         |
| 16             | 1                   | 16        | 3         |
| 17             | 1                   | 13        | 8         |
| 18             | 1                   | 5         | 1         |
| 19             | 1                   | 4         | 4         |
| 20             | 1                   | 0         | 0         |

Table for data of N2; *Ex[Pdpy-30::*dagl-1>::GFP](4)* Fig. 3E,F*

Supplementary table

| <b>age (d)</b> | <b>interval (d)</b> | <b>Nx</b> | <b>dx</b> |
|----------------|---------------------|-----------|-----------|
| 0              | n/a                 | 77        | 0         |
| 1              | 1                   | 77        | 0         |
| 2              | 1                   | 77        | 0         |
| 3              | 1                   | 77        | 0         |
| 4              | 1                   | 77        | 0         |
| 5              | 1                   | 77        | 0         |
| 6              | 1                   | 77        | 0         |
| 7              | 1                   | 77        | 1         |
| 8              | 1                   | 76        | 3         |
| 9              | 1                   | 73        | 6         |
| 10             | 1                   | 67        | 7         |
| 11             | 1                   | 60        | 11        |
| 12             | 1                   | 49        | 12        |
| 13             | 1                   | 37        | 6         |
| 14             | 1                   | 31        | 5         |
| 15             | 1                   | 26        | 7         |
| 16             | 1                   | 19        | 4         |
| 17             | 1                   | 15        | 3         |
| 18             | 1                   | 12        | 6         |
| 19             | 1                   | 6         | 1         |
| 20             | 1                   | 5         | 2         |
| 21             | 1                   | 3         | 3         |
| 22             | 1                   | 0         | 0         |

Table for data of *dagl-1(tm2908); Ex[Pdpy-30::GFP]* Fig. 3E

Supplementary table

| <b>age (d)</b> | <b>interval (d)</b> | <b>Nx</b> | <b>dx</b> |
|----------------|---------------------|-----------|-----------|
| 0              | n/a                 | 93        | 0         |
| 1              | 1                   | 93        | 0         |
| 2              | 1                   | 93        | 0         |
| 3              | 1                   | 93        | 0         |
| 4              | 1                   | 93        | 0         |
| 5              | 1                   | 93        | 0         |
| 6              | 1                   | 93        | 6         |
| 7              | 1                   | 87        | 3         |
| 8              | 1                   | 84        | 7         |
| 9              | 1                   | 77        | 9         |
| 10             | 1                   | 68        | 18        |
| 11             | 1                   | 50        | 21        |
| 12             | 1                   | 29        | 10        |
| 13             | 1                   | 19        | 5         |
| 14             | 1                   | 14        | 5         |
| 15             | 1                   | 9         | 4         |
| 16             | 1                   | 5         | 3         |
| 17             | 1                   | 2         | 2         |
| 18             | 1                   | 0         | 0         |



Table for data of *dagl-1(tm2908); Ex[Pdpy-30::*dagl-1::GFP*](4)* Fig. 3E

Supplementary table

| <b>age (d)</b> | <b>interval (d)</b> | <b>Nx</b> | <b>dx</b> |
|----------------|---------------------|-----------|-----------|
| 0              | n/a                 | 79        | 0         |
| 1              | 1                   | 79        | 0         |
| 2              | 1                   | 79        | 0         |
| 3              | 1                   | 79        | 0         |
| 4              | 1                   | 79        | 0         |
| 5              | 1                   | 79        | 0         |
| 6              | 1                   | 79        | 3         |
| 7              | 1                   | 76        | 4         |
| 8              | 1                   | 72        | 2         |
| 9              | 1                   | 70        | 9         |
| 10             | 1                   | 61        | 11        |
| 11             | 1                   | 50        | 13        |
| 12             | 1                   | 37        | 11        |
| 13             | 1                   | 26        | 8         |
| 14             | 1                   | 18        | 5         |
| 15             | 1                   | 13        | 5         |
| 16             | 1                   | 8         | 1         |
| 17             | 1                   | 7         | 4         |
| 18             | 1                   | 3         | 3         |
| 19             | 1                   | 0         | 0         |

Table for data of *dagl-1(tm3026); Ex[Pdpy-30::GFP]* Fig. 3F

Supplementary table

| <b>age (d)</b> | <b>interval (d)</b> | <b>Nx</b> | <b>dx</b> |
|----------------|---------------------|-----------|-----------|
| 0              | n/a                 | 78        | 0         |
| 1              | 1                   | 78        | 0         |
| 2              | 1                   | 78        | 0         |
| 3              | 1                   | 78        | 0         |
| 4              | 1                   | 78        | 0         |
| 5              | 1                   | 78        | 0         |
| 6              | 1                   | 78        | 4         |
| 7              | 1                   | 74        | 4         |
| 8              | 1                   | 70        | 5         |
| 9              | 1                   | 65        | 10        |
| 10             | 1                   | 55        | 15        |
| 11             | 1                   | 40        | 17        |
| 12             | 1                   | 23        | 7         |
| 13             | 1                   | 16        | 3         |
| 14             | 1                   | 13        | 4         |
| 15             | 1                   | 9         | 4         |
| 16             | 1                   | 5         | 2         |
| 17             | 1                   | 3         | 3         |
| 18             | 1                   | 0         | 0         |

Table for data of *dagl-1(tm3026); Ex[Pdpy-30::*dagl-1::GFP*](4)* Fig. 3F

Supplementary table

| <b>age (d)</b> | <b>interval (d)</b> | <b>Nx</b> | <b>dx</b> |
|----------------|---------------------|-----------|-----------|
| 0              | n/a                 | 75        | 0         |
| 1              | 1                   | 75        | 0         |
| 2              | 1                   | 75        | 0         |
| 3              | 1                   | 75        | 0         |
| 4              | 1                   | 75        | 0         |
| 5              | 1                   | 75        | 0         |
| 6              | 1                   | 75        | 2         |
| 7              | 1                   | 73        | 3         |
| 8              | 1                   | 70        | 5         |
| 9              | 1                   | 65        | 9         |
| 10             | 1                   | 56        | 11        |
| 11             | 1                   | 45        | 13        |
| 12             | 1                   | 32        | 7         |
| 13             | 1                   | 25        | 8         |
| 14             | 1                   | 17        | 3         |
| 15             | 1                   | 14        | 4         |
| 16             | 1                   | 10        | 2         |
| 17             | 1                   | 8         | 4         |
| 18             | 1                   | 4         | 2         |
| 19             | 1                   | 2         | 2         |
| 20             | 1                   | 0         | 0         |

Table for data of N2 EV Fig. 4B

Supplementary table

| <b>age (d)</b> | <b>interval (d)</b> | <b>Nx</b> | <b>dx</b> |
|----------------|---------------------|-----------|-----------|
| 0              | n/a                 | 377       | 0         |
| 1              | 1                   | 377       | 0         |
| 2              | 1                   | 377       | 0         |
| 3              | 1                   | 377       | 0         |
| 4              | 1                   | 377       | 0         |
| 5              | 1                   | 377       | 6         |
| 6              | 1                   | 371       | 20        |
| 7              | 1                   | 351       | 26        |
| 8              | 1                   | 325       | 25        |
| 9              | 1                   | 300       | 34        |
| 10             | 1                   | 266       | 31        |
| 11             | 1                   | 235       | 53        |
| 12             | 1                   | 182       | 35        |
| 13             | 1                   | 147       | 32        |
| 14             | 1                   | 115       | 43        |
| 15             | 1                   | 72        | 18        |
| 16             | 1                   | 54        | 13        |
| 17             | 1                   | 41        | 13        |
| 18             | 1                   | 28        | 13        |
| 19             | 1                   | 15        | 8         |
| 20             | 1                   | 7         | 5         |
| 21             | 1                   | 2         | 2         |
| 22             | 1                   | 0         | 0         |

Table for data of N2 *dgk-5(RNAi)* Fig. 4B

Supplementary table

| <b>age (d)</b> | <b>interval (d)</b> | <b>Nx</b> | <b>dx</b> |
|----------------|---------------------|-----------|-----------|
| 0              | n/a                 | 325       | 0         |
| 1              | 1                   | 325       | 0         |
| 2              | 1                   | 325       | 0         |
| 3              | 1                   | 325       | 0         |
| 4              | 1                   | 325       | 0         |
| 5              | 1                   | 325       | 0         |
| 6              | 1                   | 325       | 6         |
| 7              | 1                   | 319       | 9         |
| 8              | 1                   | 310       | 12        |
| 9              | 1                   | 298       | 19        |
| 10             | 1                   | 279       | 25        |
| 11             | 1                   | 254       | 27        |
| 12             | 1                   | 227       | 59        |
| 13             | 1                   | 168       | 39        |
| 14             | 1                   | 129       | 30        |
| 15             | 1                   | 99        | 39        |
| 16             | 1                   | 60        | 16        |
| 17             | 1                   | 44        | 13        |
| 18             | 1                   | 31        | 12        |
| 19             | 1                   | 19        | 12        |
| 20             | 1                   | 7         | 5         |
| 21             | 1                   | 2         | 2         |
| 22             | 1                   | 0         | 0         |

Table for data of *dagl-1(tm2908)* EV Fig. 4B

Supplementary table

| <b>age (d)</b> | <b>interval (d)</b> | <b>Nx</b> | <b>dx</b> |
|----------------|---------------------|-----------|-----------|
| 0              | n/a                 | 239       | 0         |
| 1              | 1                   | 239       | 0         |
| 2              | 1                   | 239       | 0         |
| 3              | 1                   | 239       | 0         |
| 4              | 1                   | 239       | 0         |
| 5              | 1                   | 239       | 7         |
| 6              | 1                   | 232       | 19        |
| 7              | 1                   | 213       | 23        |
| 8              | 1                   | 190       | 41        |
| 9              | 1                   | 149       | 56        |
| 10             | 1                   | 93        | 51        |
| 11             | 1                   | 42        | 16        |
| 12             | 1                   | 26        | 19        |
| 13             | 1                   | 7         | 4         |
| 14             | 1                   | 3         | 3         |
| 15             | 1                   | 0         | 0         |

Table for data of *dagl-1(tm2908) dgk-5(RNAi)* Fig. 4B

Supplementary table

| <b>age (d)</b> | <b>interval (d)</b> | <b>Nx</b> | <b>dx</b> |
|----------------|---------------------|-----------|-----------|
| 0              | n/a                 | 301       | 0         |
| 1              | 1                   | 301       | 0         |
| 2              | 1                   | 301       | 0         |
| 3              | 1                   | 301       | 0         |
| 4              | 1                   | 301       | 4         |
| 5              | 1                   | 297       | 4         |
| 6              | 1                   | 293       | 5         |
| 7              | 1                   | 288       | 17        |
| 8              | 1                   | 271       | 19        |
| 9              | 1                   | 252       | 19        |
| 10             | 1                   | 233       | 30        |
| 11             | 1                   | 203       | 38        |
| 12             | 1                   | 165       | 49        |
| 13             | 1                   | 116       | 26        |
| 14             | 1                   | 90        | 32        |
| 15             | 1                   | 58        | 18        |
| 16             | 1                   | 40        | 19        |
| 17             | 1                   | 21        | 8         |
| 18             | 1                   | 13        | 4         |
| 19             | 1                   | 9         | 5         |
| 20             | 1                   | 4         | 4         |
| 21             | 1                   | 0         | 0         |

Table for data of *dagl-1(tm3026)* EV Fig. 4B

Supplementary table

| <b>age (d)</b> | <b>interval (d)</b> | <b>Nx</b> | <b>dx</b> |
|----------------|---------------------|-----------|-----------|
| 0              | n/a                 | 238       | 0         |
| 1              | 1                   | 238       | 0         |
| 2              | 1                   | 238       | 0         |
| 3              | 1                   | 238       | 0         |
| 4              | 1                   | 238       | 0         |
| 5              | 1                   | 238       | 16        |
| 6              | 1                   | 222       | 25        |
| 7              | 1                   | 197       | 24        |
| 8              | 1                   | 173       | 35        |
| 9              | 1                   | 138       | 33        |
| 10             | 1                   | 105       | 27        |
| 11             | 1                   | 78        | 34        |
| 12             | 1                   | 44        | 17        |
| 13             | 1                   | 27        | 11        |
| 14             | 1                   | 16        | 10        |
| 15             | 1                   | 6         | 6         |
| 16             | 1                   | 0         | 0         |



Table for data of *dagl-1(tm3026) dgk-5(RNAi)* Fig. 4B

Supplementary table

| <b>age (d)</b> | <b>interval (d)</b> | <b>Nx</b> | <b>dx</b> |
|----------------|---------------------|-----------|-----------|
| 0              | n/a                 | 228       | 0         |
| 1              | 1                   | 228       | 0         |
| 2              | 1                   | 228       | 0         |
| 3              | 1                   | 228       | 0         |
| 4              | 1                   | 228       | 0         |
| 5              | 1                   | 228       | 1         |
| 6              | 1                   | 227       | 11        |
| 7              | 1                   | 216       | 8         |
| 8              | 1                   | 208       | 21        |
| 9              | 1                   | 187       | 16        |
| 10             | 1                   | 171       | 20        |
| 11             | 1                   | 151       | 20        |
| 12             | 1                   | 131       | 42        |
| 13             | 1                   | 89        | 26        |
| 14             | 1                   | 63        | 19        |
| 15             | 1                   | 44        | 14        |
| 16             | 1                   | 30        | 16        |
| 17             | 1                   | 14        | 6         |
| 18             | 1                   | 8         | 5         |
| 19             | 1                   | 3         | 2         |
| 20             | 1                   | 1         | 1         |
| 21             | 1                   | 0         | 0         |

Table for data of N2 EV Fig. 4D,E,F,G

Supplementary table

| <b>age (d)</b> | <b>interval (d)</b> | <b>Nx</b> | <b>dx</b> |
|----------------|---------------------|-----------|-----------|
| 0              | n/a                 | 164       | 0         |
| 1              | 1                   | 164       | 0         |
| 2              | 1                   | 164       | 0         |
| 3              | 1                   | 164       | 0         |
| 4              | 1                   | 164       | 1         |
| 5              | 1                   | 163       | 3         |
| 6              | 1                   | 160       | 5         |
| 7              | 1                   | 155       | 9         |
| 8              | 1                   | 146       | 18        |
| 9              | 1                   | 128       | 23        |
| 10             | 1                   | 105       | 23        |
| 11             | 1                   | 82        | 16        |
| 12             | 1                   | 66        | 13        |
| 13             | 1                   | 53        | 13        |
| 14             | 1                   | 40        | 13        |
| 15             | 1                   | 27        | 10        |
| 16             | 1                   | 17        | 8         |
| 17             | 1                   | 9         | 6         |
| 18             | 1                   | 3         | 3         |
| 19             | 1                   | 0         | 0         |

Table for data of N2 *let-363(RNAi)* Fig. 4D,E

Supplementary table

| <b>age (d)</b> | <b>interval (d)</b> | <b>Nx</b> | <b>dx</b> |
|----------------|---------------------|-----------|-----------|
| 0              | n/a                 | 86        | 0         |
| 1              | 1                   | 86        | 0         |
| 2              | 1                   | 86        | 0         |
| 3              | 1                   | 86        | 0         |
| 4              | 1                   | 86        | 0         |
| 5              | 1                   | 86        | 1         |
| 6              | 1                   | 85        | 0         |
| 7              | 1                   | 85        | 2         |
| 8              | 1                   | 83        | 1         |
| 9              | 1                   | 82        | 7         |
| 10             | 1                   | 75        | 9         |
| 11             | 1                   | 66        | 12        |
| 12             | 1                   | 54        | 10        |
| 13             | 1                   | 44        | 7         |
| 14             | 1                   | 37        | 10        |
| 15             | 1                   | 27        | 5         |
| 16             | 1                   | 22        | 7         |
| 17             | 1                   | 15        | 3         |
| 18             | 1                   | 12        | 4         |
| 19             | 1                   | 8         | 5         |
| 20             | 1                   | 3         | 3         |
| 21             | 1                   | 0         | 0         |

Table for data of *dagl-1(tm2908)* EV Fig. 4D,F

Supplementary table

| <b>age (d)</b> | <b>interval (d)</b> | <b>Nx</b> | <b>dx</b> |
|----------------|---------------------|-----------|-----------|
| 0              | n/a                 | 104       | 0         |
| 1              | 1                   | 104       | 0         |
| 2              | 1                   | 104       | 0         |
| 3              | 1                   | 104       | 0         |
| 4              | 1                   | 104       | 0         |
| 5              | 1                   | 104       | 3         |
| 6              | 1                   | 101       | 8         |
| 7              | 1                   | 93        | 11        |
| 8              | 1                   | 82        | 22        |
| 9              | 1                   | 60        | 23        |
| 10             | 1                   | 37        | 25        |
| 11             | 1                   | 12        | 3         |
| 12             | 1                   | 9         | 7         |
| 13             | 1                   | 2         | 1         |
| 14             | 1                   | 1         | 1         |
| 15             | 1                   | 0         | 0         |

Table for data of *dagl-1(tm2908) let-363(RNAi)* Fig. 4D

Supplementary table

| <b>age (d)</b> | <b>interval (d)</b> | <b>Nx</b> | <b>dx</b> |
|----------------|---------------------|-----------|-----------|
| 0              | n/a                 | 77        | 0         |
| 1              | 1                   | 77        | 0         |
| 2              | 1                   | 77        | 0         |
| 3              | 1                   | 77        | 0         |
| 4              | 1                   | 77        | 0         |
| 5              | 1                   | 77        | 0         |
| 6              | 1                   | 77        | 2         |
| 7              | 1                   | 75        | 2         |
| 8              | 1                   | 73        | 8         |
| 9              | 1                   | 65        | 6         |
| 10             | 1                   | 59        | 6         |
| 11             | 1                   | 53        | 8         |
| 12             | 1                   | 45        | 13        |
| 13             | 1                   | 32        | 9         |
| 14             | 1                   | 23        | 5         |
| 15             | 1                   | 18        | 6         |
| 16             | 1                   | 12        | 6         |
| 17             | 1                   | 6         | 2         |
| 18             | 1                   | 4         | 2         |
| 19             | 1                   | 2         | 2         |
| 20             | 1                   | 0         | 0         |

Table for data of *dagl-1(tm3026)* EV Fig. 4E,G

Supplementary table

| <b>age (d)</b> | <b>interval (d)</b> | <b>Nx</b> | <b>dx</b> |
|----------------|---------------------|-----------|-----------|
| 0              | n/a                 | 93        | 0         |
| 1              | 1                   | 93        | 0         |
| 2              | 1                   | 93        | 0         |
| 3              | 1                   | 93        | 0         |
| 4              | 1                   | 93        | 0         |
| 5              | 1                   | 93        | 4         |
| 6              | 1                   | 89        | 7         |
| 7              | 1                   | 82        | 10        |
| 8              | 1                   | 72        | 12        |
| 9              | 1                   | 60        | 18        |
| 10             | 1                   | 42        | 14        |
| 11             | 1                   | 28        | 9         |
| 12             | 1                   | 19        | 8         |
| 13             | 1                   | 11        | 3         |
| 14             | 1                   | 8         | 6         |
| 15             | 1                   | 2         | 2         |
| 16             | 1                   | 0         | 0         |

Table for data of *dagl-1(tm3026) let-363(RNAi)* Fig. 4E

Supplementary table

| <b>age (d)</b> | <b>interval (d)</b> | <b>Nx</b> | <b>dx</b> |
|----------------|---------------------|-----------|-----------|
| 0              | n/a                 | 94        | 0         |
| 1              | 1                   | 94        | 0         |
| 2              | 1                   | 94        | 0         |
| 3              | 1                   | 94        | 0         |
| 4              | 1                   | 94        | 1         |
| 5              | 1                   | 93        | 1         |
| 6              | 1                   | 92        | 2         |
| 7              | 1                   | 90        | 7         |
| 8              | 1                   | 83        | 5         |
| 9              | 1                   | 78        | 3         |
| 10             | 1                   | 75        | 11        |
| 11             | 1                   | 64        | 6         |
| 12             | 1                   | 58        | 15        |
| 13             | 1                   | 43        | 11        |
| 14             | 1                   | 32        | 6         |
| 15             | 1                   | 26        | 12        |
| 16             | 1                   | 14        | 6         |
| 17             | 1                   | 8         | 3         |
| 18             | 1                   | 5         | 3         |
| 19             | 1                   | 2         | 2         |
| 20             | 1                   | 0         | 0         |

Table for data of N2 *daf-15(RNAi)* Fig. 4F,G

Supplementary table

| <b>age (d)</b> | <b>interval (d)</b> | <b>Nx</b> | <b>dx</b> |
|----------------|---------------------|-----------|-----------|
| 0              | n/a                 | 91        | 0         |
| 1              | 1                   | 91        | 0         |
| 2              | 1                   | 91        | 0         |
| 3              | 1                   | 91        | 0         |
| 4              | 1                   | 91        | 0         |
| 5              | 1                   | 91        | 1         |
| 6              | 1                   | 90        | 2         |
| 7              | 1                   | 88        | 1         |
| 8              | 1                   | 87        | 7         |
| 9              | 1                   | 80        | 6         |
| 10             | 1                   | 74        | 4         |
| 11             | 1                   | 70        | 14        |
| 12             | 1                   | 56        | 15        |
| 13             | 1                   | 41        | 8         |
| 14             | 1                   | 33        | 8         |
| 15             | 1                   | 25        | 4         |
| 16             | 1                   | 21        | 7         |
| 17             | 1                   | 14        | 6         |
| 18             | 1                   | 8         | 5         |
| 19             | 1                   | 3         | 2         |
| 20             | 1                   | 1         | 1         |
| 21             | 1                   | 0         | 0         |



Table for data of *dagl-1(tm2908) daf-15(RNAi)* Fig. 4F

Supplementary table

| <b>age (d)</b> | <b>interval (d)</b> | <b>Nx</b> | <b>dx</b> |
|----------------|---------------------|-----------|-----------|
| 0              | n/a                 | 94        | 0         |
| 1              | 1                   | 94        | 0         |
| 2              | 1                   | 94        | 0         |
| 3              | 1                   | 94        | 0         |
| 4              | 1                   | 94        | 1         |
| 5              | 1                   | 93        | 1         |
| 6              | 1                   | 92        | 2         |
| 7              | 1                   | 90        | 7         |
| 8              | 1                   | 83        | 5         |
| 9              | 1                   | 78        | 8         |
| 10             | 1                   | 70        | 6         |
| 11             | 1                   | 64        | 12        |
| 12             | 1                   | 52        | 8         |
| 13             | 1                   | 44        | 12        |
| 14             | 1                   | 32        | 12        |
| 15             | 1                   | 20        | 10        |
| 16             | 1                   | 10        | 5         |
| 17             | 1                   | 5         | 3         |
| 18             | 1                   | 2         | 0         |
| 19             | 1                   | 2         | 2         |
| 20             | 1                   | 0         | 0         |

Table for data of *dagl-1(tm3026) daf-15(RNAi)* Fig. 4G

Supplementary table

| <b>age (d)</b> | <b>interval (d)</b> | <b>Nx</b> | <b>dx</b> |
|----------------|---------------------|-----------|-----------|
| 0              | n/a                 | 84        | 0         |
| 1              | 1                   | 84        | 0         |
| 2              | 1                   | 84        | 0         |
| 3              | 1                   | 84        | 0         |
| 4              | 1                   | 84        | 0         |
| 5              | 1                   | 84        | 1         |
| 6              | 1                   | 83        | 3         |
| 7              | 1                   | 80        | 3         |
| 8              | 1                   | 77        | 6         |
| 9              | 1                   | 71        | 5         |
| 10             | 1                   | 66        | 9         |
| 11             | 1                   | 57        | 7         |
| 12             | 1                   | 50        | 10        |
| 13             | 1                   | 40        | 7         |
| 14             | 1                   | 33        | 16        |
| 15             | 1                   | 17        | 8         |
| 16             | 1                   | 9         | 6         |
| 17             | 1                   | 3         | 1         |
| 18             | 1                   | 2         | 2         |
| 19             | 1                   | 0         | 0         |

Table for data of  $w^{1118}$  male Fig. S3A

Supplementary table

| <b>age (d)</b> | <b>interval (d)</b> | <b>Nx</b> | <b>dx</b> |
|----------------|---------------------|-----------|-----------|
| 0              | n/a                 | 293       | 0         |
| 3              | 3                   | 293       | 1         |
| 7              | 4                   | 292       | 0         |
| 10             | 3                   | 292       | 0         |
| 14             | 4                   | 292       | 3         |
| 17             | 3                   | 289       | 9         |
| 21             | 4                   | 280       | 6         |
| 24             | 3                   | 274       | 31        |
| 28             | 4                   | 243       | 25        |
| 31             | 3                   | 218       | 34        |
| 35             | 4                   | 184       | 27        |
| 38             | 3                   | 157       | 61        |
| 43             | 5                   | 96        | 56        |
| 48             | 5                   | 40        | 5         |
| 51             | 3                   | 35        | 11        |
| 53             | 2                   | 24        | 8         |
| 56             | 3                   | 16        | 7         |
| 59             | 3                   | 9         | 9         |
| 63             | 4                   | 0         | 0         |

Table for data of *rdgA*<sup>BL33306</sup> male Fig. S3A

Supplementary table

| <b>age (d)</b> | <b>interval (d)</b> | <b>Nx</b> | <b>dx</b> |
|----------------|---------------------|-----------|-----------|
| 0              | n/a                 | 279       | 0         |
| 3              | 3                   | 279       | 0         |
| 7              | 4                   | 279       | 1         |
| 10             | 3                   | 278       | 0         |
| 14             | 4                   | 278       | 2         |
| 17             | 3                   | 276       | 3         |
| 21             | 4                   | 273       | 2         |
| 24             | 3                   | 271       | 1         |
| 28             | 4                   | 270       | 3         |
| 31             | 3                   | 267       | 0         |
| 35             | 4                   | 267       | 2         |
| 38             | 3                   | 265       | 6         |
| 43             | 5                   | 259       | 20        |
| 48             | 5                   | 239       | 9         |
| 51             | 3                   | 230       | 12        |
| 53             | 2                   | 218       | 13        |
| 56             | 3                   | 205       | 23        |
| 59             | 3                   | 182       | 66        |
| 63             | 4                   | 116       | 15        |
| 66             | 3                   | 101       | 54        |
| 70             | 4                   | 47        | 6         |
| 73             | 3                   | 41        | 14        |
| 77             | 4                   | 27        | 11        |
| 80             | 3                   | 16        | 7         |
| 84             | 4                   | 9         | 4         |
| 87             | 3                   | 5         | 5         |
| 91             | 4                   | 0         | 0         |

Table for data of *rdgA*<sup>BL20320</sup> male Fig. S3A

Supplementary table

| <b>age (d)</b> | <b>interval (d)</b> | <b>Nx</b> | <b>dx</b> |
|----------------|---------------------|-----------|-----------|
| 0              | n/a                 | 283       | 0         |
| 3              | 3                   | 283       | 1         |
| 7              | 4                   | 282       | 2         |
| 10             | 3                   | 280       | 2         |
| 14             | 4                   | 278       | 0         |
| 17             | 3                   | 278       | 2         |
| 21             | 4                   | 276       | 1         |
| 24             | 3                   | 275       | 3         |
| 28             | 4                   | 272       | 5         |
| 31             | 3                   | 267       | 10        |
| 35             | 4                   | 257       | 7         |
| 38             | 3                   | 250       | 21        |
| 43             | 5                   | 229       | 25        |
| 48             | 5                   | 204       | 19        |
| 51             | 3                   | 185       | 10        |
| 53             | 2                   | 175       | 17        |
| 56             | 3                   | 158       | 21        |
| 59             | 3                   | 137       | 48        |
| 63             | 4                   | 89        | 11        |
| 66             | 3                   | 78        | 33        |
| 70             | 4                   | 45        | 7         |
| 73             | 3                   | 38        | 21        |
| 77             | 4                   | 17        | 10        |
| 80             | 3                   | 7         | 7         |
| 84             | 4                   | 0         | 0         |

Table for data of N2 Fig. S3D

Supplementary table

| <b>age (d)</b> | <b>interval (d)</b> | <b>Nx</b> | <b>dx</b> |
|----------------|---------------------|-----------|-----------|
| 0              | n/a                 | 216       | 0         |
| 1              | 1                   | 216       | 0         |
| 2              | 1                   | 216       | 0         |
| 3              | 1                   | 216       | 0         |
| 4              | 1                   | 216       | 0         |
| 5              | 1                   | 216       | 2         |
| 6              | 1                   | 214       | 7         |
| 7              | 1                   | 207       | 10        |
| 8              | 1                   | 197       | 25        |
| 9              | 1                   | 172       | 24        |
| 10             | 1                   | 148       | 31        |
| 11             | 1                   | 117       | 16        |
| 12             | 1                   | 101       | 25        |
| 13             | 1                   | 76        | 24        |
| 14             | 1                   | 52        | 16        |
| 15             | 1                   | 36        | 15        |
| 16             | 1                   | 21        | 11        |
| 17             | 1                   | 10        | 5         |
| 18             | 1                   | 5         | 3         |
| 19             | 1                   | 2         | 2         |
| 20             | 1                   | 0         | 0         |

Table for data of *dgk-5(ok2366)* Fig. S3D

Supplementary table

| <b>age (d)</b> | <b>interval (d)</b> | <b>Nx</b> | <b>dx</b> |
|----------------|---------------------|-----------|-----------|
| 0              | n/a                 | 287       | 0         |
| 1              | 1                   | 287       | 0         |
| 2              | 1                   | 287       | 0         |
| 3              | 1                   | 287       | 0         |
| 4              | 1                   | 287       | 0         |
| 5              | 1                   | 287       | 3         |
| 6              | 1                   | 284       | 6         |
| 7              | 1                   | 278       | 13        |
| 8              | 1                   | 265       | 21        |
| 9              | 1                   | 244       | 25        |
| 10             | 1                   | 219       | 33        |
| 11             | 1                   | 186       | 31        |
| 12             | 1                   | 155       | 29        |
| 13             | 1                   | 126       | 25        |
| 14             | 1                   | 101       | 20        |
| 15             | 1                   | 81        | 24        |
| 16             | 1                   | 57        | 22        |
| 17             | 1                   | 35        | 12        |
| 18             | 1                   | 23        | 9         |
| 19             | 1                   | 14        | 4         |
| 20             | 1                   | 10        | 4         |
| 21             | 1                   | 6         | 4         |
| 22             | 1                   | 2         | 2         |
| 23             | 1                   | 0         | 0         |

Table for data of *dgk-5(gk631)* Fig. S3D

Supplementary table

| <b>age (d)</b> | <b>interval (d)</b> | <b>Nx</b> | <b>dx</b> |
|----------------|---------------------|-----------|-----------|
| 0              | n/a                 | 207       | 0         |
| 1              | 1                   | 207       | 0         |
| 2              | 1                   | 207       | 0         |
| 3              | 1                   | 207       | 0         |
| 4              | 1                   | 207       | 0         |
| 5              | 1                   | 207       | 2         |
| 6              | 1                   | 205       | 5         |
| 7              | 1                   | 200       | 12        |
| 8              | 1                   | 188       | 16        |
| 9              | 1                   | 172       | 7         |
| 10             | 1                   | 165       | 16        |
| 11             | 1                   | 149       | 15        |
| 12             | 1                   | 134       | 27        |
| 13             | 1                   | 107       | 25        |
| 14             | 1                   | 82        | 20        |
| 15             | 1                   | 62        | 20        |
| 16             | 1                   | 42        | 14        |
| 17             | 1                   | 28        | 10        |
| 18             | 1                   | 18        | 5         |
| 19             | 1                   | 13        | 5         |
| 20             | 1                   | 8         | 4         |
| 21             | 1                   | 4         | 4         |
| 22             | 1                   | 0         | 0         |
